# Supplementary material
Source: PubMed Central journal article supplement (PMC3207440)
Supplement: supp_M111.252171_jbc.M111.252171-1.pdf [file supp_M111.252171_jbc.M111.252171-1.pdf]

**Supplementary Table 1.** Proteins identified in tandem mass spectrometry-based comparison of young and aged adult primary neural stem/progenitor cells.

| <i>IPI</i>  | <i>Protein</i>                                            | <i>ASAP<br/>Ratio</i> | <i>Peptides</i> | <i>Description/Pathway</i>                         |
|-------------|-----------------------------------------------------------|-----------------------|-----------------|----------------------------------------------------|
| IPI00113141 | Ctsd Citrate synthase                                     | 0.84                  | 7               | mitochondrial/TCA cycle                            |
| IPI00129928 | Fh1 Fumarate hydratase                                    | 0.9                   | 4               | mitochondrial/TCA cycle                            |
| IPI00119114 | Acadl Long-chain acyl-CoA dehydrogenase                   | 0.84                  | 6               | mitochondrial/fatty acid oxidation                 |
| IPI00119458 | Aldoc Fructose-bisphosphate aldolase C                    | 0.89                  | 6               | mitochondrial/glycolysis                           |
| IPI00462072 | Eno1 Alpha-enolase                                        | 0.7                   | 16              | cytoplasmic/glycolysis                             |
| IPI00342603 | Ogdhl oxoglutarate dehydrogenase-like                     | 0.56                  | 1               | mitochondrial/links TCA cycle to protein synthesis |
| IPI00136703 | Ckb Creatine kinase B-type                                | 0.71                  | 38              | cytoplasmic/phosphoprotein                         |
| IPI00468481 | Atp5b ATP synthase subunit beta                           | 0.68                  | 10              | mitochondrial/complex V (ATP synthesis)            |
| IPI00130280 | Atp5a1 ATP synthase subunit alpha                         | 0.64                  | 9               | mitochondrial/complex V (ATP synthesis)            |
| IPI00226073 | Hnrpd Heterogeneous nuclear ribonucleoprotein F isoform 2 | 0.8                   | 2               | nuclear/RNA processing & stabilization             |
| IPI00454016 | Mat2a S-adenosylmethionine synthetase isoform type-2      | 0.8                   | 1               | cytoplasmic/methionine adenosyltransferase         |
| IPI00318841 | Eef1g Elongation factor 1-gamma                           | 0.9                   | 4               | ribosomal/protein biosynthesis                     |
| IPI00119618 | Canx Calnexin precursor                                   | 0.86                  | 7               | ER/protein processing & retention                  |
| IPI00608097 | Npepps Aminopeptidase puromycin sensitive                 | 0.68                  | 7               | nuclear/proteolysis, proliferation                 |
| IPI00122565 | Gdi2 Rab GDP dissociation inhibitor beta isoform 1        | 0.87                  | 5               | membrane/signal transduction                       |
| IPI00111560 | SET Phosphatase 2A inhibitor                              | 0.79                  | 3               | nuclear/inhibits acetylation of histones           |
| IPI00123129 | Snd1 Staphylococcal nuclease domain-containing protein 1  | 0.66                  | 5               | nuclear/transcrip coactivator of STAT5/6           |
| IPI00272033 | Hist2h2ac Histone H2A type 2-C                            | 0.7                   | 7               | nuclear/chromosomal stability & proliferation      |
| IPI00312128 | Trim28 Transcription intermediary factor 1-beta isoform 1 | 0.53                  | 3               | nuclear/transcriptional activator of TWIST         |
| IPI00462752 | Myo6 myosin VI (brain specific)                           | 0.64                  | 3               | membrane/vesicle transport, neurite extension      |
| IPI00762919 | Hip1 Huntingtin interacting protein 1                     | 0.88                  | 3               | membrane/vesicle transport, apoptosis              |
| IPI00676914 | Hypothetical protein similar to valosin isoform 1         | 0.88                  | 16              | golgi/phosprot breaks down stacks at mitosis       |
| IPI00331556 | Hspa4 Heat shock 70 kDa protein 4                         | 0.88                  | 9               | cytoplasmic/stress response                        |
| IPI00116074 | Aco2 Aconitate hydratase                                  | 1.12                  | 3               | mitochondrial/TCA cycle                            |
| IPI00336324 | Mdh1 Malate dehydrogenase                                 | 1.55                  | 2               | cytoplasmic/TCA cycle                              |
| IPI00121833 | Acaa1a 3-ketoacyl-CoA thiolase A                          | 1.57                  | 2               | perioxosomal/fatty acid metabolism                 |
| IPI00154054 | Acat1 Acetyl-CoA acetyltransferase                        | 1.43                  | 6               | mitochondrial/mevalonate pathway                   |
| IPI00221402 | Aldoa Fructose-bisphosphate aldolase A                    | 1.53                  | 5               | mitochondrial/glycolysis                           |
| IPI00555069 | Pgk1 Phosphoglycerate kinase 1                            | 1.23                  | 14              | cytoplasmic/glycolysis                             |
| IPI00420706 | Lrpprc Leucine-rich PPR motif-containing protein          | 2.32                  | 2               | mitochondrial/protein biosynthesis (esp CytoC ox)  |
| IPI00130353 | Vars Valyl-tRNA synthetase                                | 2.18                  | 4               | mitochondrial/protein biosynthesis                 |
| IPI00458583 | Hnrnpu heterogeneous nuclear ribonucleoprotein U          | 1.27                  | 6               | nuclear/mRNA processing and synthesis              |
| IPI00128904 | Pcbp1 Poly(rC)-binding protein 1                          | 1.19                  | 3               | nuclear/RNA processing                             |
| IPI00118676 | Eif4a1 Eukaryotic initiation factor 4A-I                  | 1.29                  | 11              | ribosomal/RNA helicase                             |

**Supplementary Table 1 (continued).** Proteins identified in tandem mass spectrometry-based comparison of young and aged adult primary neural stem/progenitor cells.

| <i>IPI</i>  | <i>Protein</i>                                                              | <i>ASAP Ratio</i> | <i>Peptide #</i> | <i>Description/Pathway</i>                    |
|-------------|-----------------------------------------------------------------------------|-------------------|------------------|-----------------------------------------------|
| IPI00122862 | Mthfd1 C-1-tetrahydrofolate synthase                                        | 1.13              | 2                | cytoplasmic/amino acid biosynthesis           |
| IPI00114733 | Serpinh1 Serpin H1 precursor                                                | 1.15              | 7                | ER/protein biosynthesis (esp collagen)        |
| IPI00307837 | Eef1a1 Elongation factor 1-alpha 1                                          | 1.2               | 16               | ribosomal/protein biosynthesis                |
| IPI00466069 | Eef2 Elongation factor 2                                                    | 1.31              | 13               | ribosomal/protein biosynthesis                |
| IPI00115679 | Ganab Isoform 2 of Neutral alpha-glucosidase AB precursor                   | 1.15              | 2                | ER/protein processing (esp glycoprotein)      |
| IPI00129526 | Hsp90b1 Endoplasmic precursor                                               | 1.2               | 16               | ER/protein processing & transport             |
| IPI00320217 | Cct2 T-complex protein 1 subunit beta                                       | 1.13              | 6                | cytoplasmic/protein folding (esp actin)       |
| IPI00123313 | Uba1 Ubiquitin-like modifier-activating enzyme 1 X                          | 1.14              | 13               | cytoplasmic/proteolysis                       |
| IPI00169916 | Cltc Clathrin heavy chain 1                                                 | 1.35              | 7                | membrane/vesicle transport                    |
| IPI00409936 | Ipo5 Isoform 2 of Importin subunit beta-3                                   | 1.31              | 3                | cytoplasmic/nuclear transport                 |
| IPI00420569 | Atp1a2 Na/K-transporting ATPase subunit alpha-2                             | 1.12              | 4                | membrane/ion pump & phosphoprotein            |
| IPI00229080 | Hsp90ab1 Heat shock protein 84b                                             | 1.21              | 5                | cytoplasmic/stress response                   |
| IPI00457611 | Sept9 Isoform 1 of Septin-9                                                 | 2.3               | 1                | nuclear/negative regulation of cell cycle     |
| IPI00111013 | Ctsd Cathepsin D precursor                                                  | 1.00              | 2                | cytoplasmic/proteolysis                       |
| IPI00112129 | Gatm Glycine amidinotransferase, mitochondrial precursor                    | 0.99              | 2                | mitochondrial/amine biosynthesis              |
| IPI00113214 | Usp5 Ubiquitin carboxyl-terminal hydrolase 5                                | 1.00              | 3                | nuclear/proteolysis                           |
| IPI00115620 | Psat1 Phosphoserine aminotransferase                                        | 1.00              | 3                | cytoplasmic/amino acid biosynthesis           |
| IPI00117288 | Hnrpab Heterogeneous nuclear ribonucleoprotein A/B                          | 1.00              | 2                | nuclear/RNA synthesis                         |
| IPI00118899 | Actn4 Alpha-actinin-4                                                       | 1.00              | 3                | cytoplasmic/nuclear transport                 |
| IPI00119689 | Ap2b1 Isoform 1 of AP-2 complex subunit beta-1                              | 1.00              | 3                | membrane/clathrin vesicle assembly            |
| IPI00121515 | Caprin1 cytoplasmic activation/proliferation-associated protein 1           | 1.00              | 2                | cytoplasmic/neuronal differentiation          |
| IPI00135231 | Idh1 0 day neonate lung cDNA                                                | 1.00              | 3                | mitochondrial/TCA cycle                       |
| IPI00224626 | Sept7 cell division cycle 10 homolog                                        | 1.08              | 4                | cytoplasmic/spindle formation & mitosis       |
| IPI00230086 | Hnrpd Isoform 2 of Heterogeneous nuclear ribonucleoprotein D0               | 1.00              | 3                | nuclear/RNA synthesis                         |
| IPI00230440 | Ahcy Adenosylhomocysteinase                                                 | 1.00              | 4                | cytoplasmic/amino acid biosynthesis           |
| IPI00317794 | Ncl Nucleolin                                                               | 1.00              | 4                | nuclear/RNA binding and transcription         |
| IPI00321647 | Eif3c Eukaryotic translation initiation factor 3 subunit C                  | 1.00              | 2                | cytoplasmic/protein synthesis                 |
| IPI00459487 | Suclg2 Isoform 1 of Succinyl-CoA ligase beta-chain, mitochondrial precursor | 1.00              | 2                | mitochondrial/TCA cycle                       |
| IPI00110827 | Acta1 Alpha actin                                                           | 0.99              | 14               | cytoskeletal/cytoskeleton                     |
| IPI00120886 | Ybx1 Nuclease-sensitive element-binding protein 1                           | 1.00              | 3                | cytoplasmic/RNA stabilization & translation   |
| IPI00122339 | Thoc4 Isoform 2 of THO complex subunit 4                                    | 1.00              | 8                | nuclear/mRNA synthesis                        |
| IPI00555055 | H2afv Histone H2AV                                                          | 1.00              | 4                | nuclear/chromosomal stability & proliferation |
| IPI00123604 | Rpsa 40S ribosomal protein SA                                               | 1.01              | 2                | membrane/non-integrin laminin receptor        |
| IPI00130144 | Ephx1 Microsomal epoxide hydrolase                                          | 1.00              | 2                | microsomal/catabolism & detoxification        |

**Supplementary Table 1 (continued).** Proteins identified in tandem mass spectrometry-based comparison of young and aged adult primary neural stem/progenitor cells.

| <i>IPI</i>  | <i>Protein</i>                                                               | <i>ASAP Ratio</i> | <i>Peptide #</i> | <i>Description/Pathway</i>                   |
|-------------|------------------------------------------------------------------------------|-------------------|------------------|----------------------------------------------|
| IPI00322096 | Paics Multifunctional protein ADE2                                           | 1.00              | 2                | cytoplasmic/purine biosynthesis              |
| IPI00321308 | Aars Alanyl-tRNA synthetase, cytoplasmic                                     | 1.00              | 3                | cytoplasmic/protein synthesis                |
| IPI00130391 | Prss3 Prss1 protease                                                         | 1.00              | 2                | cytoplasmic/proteolysis                      |
| IPI00330804 | Hsp90aa1 Heat shock protein HSP 90-alpha                                     | 1.00              | 2                | cytoplasmic/mitochondrial stress response    |
| IPI00120415 | Rtn4 Isoform 3 of Reticulon-4                                                | 1.00              | 2                | ER/neurite outgrowth inhibitor               |
| IPI00124954 | Kif5b Kinesin-1 heavy chain                                                  | 1.00              | 2                | cytoskeletal/trafficking of organelles       |
| IPI00125971 | Psmc6 26S protease regulatory subunit S10B                                   | 1.00              | 1                | cytoplasmic/proteolysis                      |
| IPI00133528 | Golph3 Golgi phosphoprotein 3                                                | 1.00              | 1                | golgi/phosphoprotein                         |
| IPI00318545 | Bpnt1 3'(2'),5'-bisphosphate nucleotidase 1                                  | 1.00              | 1                | cytoplasmic/signal transduction (AMP)        |
| IPI00318614 | Idh2 Isocitrate dehydrogenase [NADP], mitochondrial precursor                | 1.00              | 1                | mitochondrial/TCA cycle                      |
| IPI00339916 | Eprs Bifunctional aminoacyl-tRNA synthetase                                  | 1.00              | 1                | cytoplasmic/protein synthesis                |
| IPI00755181 | Krt10 keratin complex 1                                                      | 1.00              | 1                | cytoskeletal/protein binding                 |
| IPI00228633 | Gpi1 Glucose-6-phosphate isomerase                                           | 1.00              | 1                | cytoplasmic/glycolysis                       |
| IPI00113223 | Fasn Fatty acid synthase                                                     | 1.00              | 1                | cytoplasmic/fatty acid synthesis             |
| IPI00222917 | Plekhm3 Isoform 1 of Pleckstrin homology domain-containing family M member 3 | 1.00              | 1                | cytoplasmic/signal transduction              |
| IPI00405227 | Vcl Vinculin                                                                 | 1.00              | 1                | membrane/cell adhesion                       |
| IPI00267295 | Psmd1 26S proteasome non-ATPase regulatory subunit 1                         | 1.00              | 1                | proteasome/proteolysis                       |
| IPI00387232 | Nsf1c Isoform 3 of NSF1 cofactor p47                                         | 1.00              | 1                | golgi/phosprot breaks down stacks at mitosis |
| IPI00119138 | Uqcrc2 Cytochrome b-c1 complex subunit 2, mitochondrial precursor            | 1.00              | 2                | mitochondrial/complex III                    |
| IPI00315550 | Glx3 Glutaredoxin-3                                                          | 1.00              | 2                | cytoplasmic/redox homeostasis                |
| IPI00283611 | Hk1 Isoform HK1-SA of Hexokinase-1                                           | 1.00              | 1                | cytoplasmic/glycolysis                       |
| IPI00420385 | Sept11 Isoform 3 of Septin-11                                                | 1.00              | 1                | nuclear/cell cycle                           |
| IPI00135640 | Psmc5 26S protease regulatory subunit 8                                      | 1.00              | 2                | cytoplasmic/proteolysis                      |
| IPI00120245 | Itgav Integrin alpha-V precursor                                             | 1.00              | 1                | membrane/cell adhesion                       |
| IPI00133066 | Psmd12 Bone marrow macrophage cDNA                                           | 1.00              | 1                | proteasome/proteolysis                       |
| IPI00130661 | Tpp1 Tripeptidyl-peptidase 1 precursor                                       | 1.00              | 1                | lysosome/proteolysis                         |
| IPI00111412 | Rpl4 60S ribosomal protein L4                                                | 1.00              | 1                | cytoplasmic/RNA synthesis                    |
| IPI00134854 | Fndc8 Isoform 1 of Fibronectin type III domain-containing protein 8          | 1.00              | 1                | membrane/glycoprotein synapse binding        |
| IPI00115607 | Hadhb Trifunctional enzyme subunit beta, mitochondrial precursor             | 1.00              | 1                | mitochondrial/fatty acid metabolism          |
| IPI00466919 | Pgd 6-phosphogluconate dehydrogenase                                         | 1.00              | 1                | cytoplasmic/pentose phosphate pathway        |
| IPI00119305 | Pa2g4 Proliferation-associated protein 2G4                                   | 1.00              | 1                | nuclear/ErbB-induced cell cycle arrest       |
| IPI00116991 | Hars Histidyl-tRNA synthetase                                                | 1.00              | 1                | cytoplasmic/protein synthesis                |
| IPI00129178 | Oat Ornithine aminotransferase, mitochondrial precursor                      | 1.00              | 1                | mitochondrial/protein biosynthesis           |
| IPI00121149 | Rrbp1 Isoform 3 of Ribosome-binding protein 1                                | 1.00              | 1                | ER/protein transport                         |

**Supplementary Table 1 (continued).** Proteins identified in tandem mass spectrometry-based comparison of young and aged adult primary neural stem/progenitor cells.

| <i>IPI</i>  | <i>Protein</i>                                                             | <i>ASAP Ratio</i> | <i>Peptide #</i> | <i>Description/Pathway</i>                   |
|-------------|----------------------------------------------------------------------------|-------------------|------------------|----------------------------------------------|
| IPI00137409 | Tkt Transketolase                                                          | 1.00              | 1                | cytoplasmic/pentose phosphate pathway        |
| IPI00135700 | Rik XTP3-transactivated gene A protein homolog                             | 1.00              | 1                | ER/protein binding and signal transduction   |
| IPI00621272 | Nhp2l1 NHP2-like protein 1                                                 | 1.00              | 1                | nuclear/mRNA synthesis and processing        |
| IPI00123342 | Hyou1 Hypoxia up-regulated protein 1 precursor                             | 1.00              | 1                | ER/cell stress (protective during hypoxia)   |
| IPI00109109 | Sod2 Superoxide dismutase [Mn], mitochondrial precursor                    | 1.00              | 1                | mitochondrial/removal of superoxide radicals |
| IPI00127558 | Acox1 Peroxisomal acyl-coenzyme A oxidase 1                                | 1.00              | 1                | peroxisome/fatty acid oxidation              |
| IPI00138892 | Uba52 similar to ubiquitin A-52 residue ribosomal protein fusion product 1 | 1.00              | 1                | ribosomal/protein synthesis                  |
| IPI00112963 | Ctnna1 Catenin alpha-1                                                     | 1.00              | 1                | cytoskeletal/cell adhesion                   |
| IPI00402982 | Tmod2 Isoform 1 of Tropomodulin-2                                          | 1.00              | 1                | cytoskeletal/protein binding and assembly    |
| IPI00119239 | Psmb6 Proteasome subunit beta type-6 precursor                             | 1.00              | 1                | cytoplasmic/proteolysis                      |
| IPI00127267 | Gldc Glycine dehydrogenase, mitochondrial precursor                        | 1.00              | 2                | mitochondrial/glycine metabolism             |
| IPI00123202 | Atxn10 Ataxin-10                                                           | 1.00              | 1                | cytoplasmic/induces neurite extension        |
| IPI00337893 | Pdha1 Pyruvate dehydrogenase E1 component subunit alpha                    | 1.00              | 1                | mitochondrial/glycolysis                     |
| IPI00347110 | Krt73 Keratin, type II cytoskeletal 73                                     | 1.00              | 1                | cytoskeletal/protein binding                 |
| IPI00471246 | Ivd Isovaleryl-CoA dehydrogenase, mitochondrial precursor                  | 1.00              | 1                | mitochondrial/oxidoreductase                 |
| IPI00124281 | Myo1b myosin IB                                                            | 1.00              | 1                | cytoplasmic/neurite extension                |
| IPI00120495 | Prmt1 Isoform 1 of Protein arginine N-methyltransferase 1                  | 1.00              | 2                | nuclear/signal transduction                  |
| IPI00229859 | Eif3b Eif3b protein                                                        | 1.00              | 1                | cytoplasmic/protein synthesis                |
| IPI00126072 | Vat1 Synaptic vesicle membrane protein VAT-1 homolog                       | 1.00              | 1                | membrane/oxidoreductase                      |
| IPI00264211 | Xpo5 11 days embryo whole body cDNA                                        | 1.00              | 1                | nuclear/export of proteins and RNA           |
| IPI00115097 | Copb2 Coatamer subunit beta'                                               | 1.00              | 1                | ER-Golgi/protein transport and synthesis     |
| IPI00123624 | Rik Protein KIAA1967 homolog                                               | 1.00              | 1                | cytoplasmic/phosphoprotein                   |

20–50% increase = ASAP ratio 1.20-1.49  
 20–50% decrease = ASAP ratio 0.67-0.83

50–100% increase = ASAP ratio 1.50-2.00  
 50–100% decrease = ASAP ratio 0.51-0.66
